# Supplementary material for: The Encapsulation of Natural Organic Dyes on TiO2 for Photochromism Control
Source: MDPI journal article supplement (doi:10.3390/ijms24097860), 2023-04-26
Supplement: s1 [file s1]

# Supplementary Materials

## The encapsulation of natural organic dyes on TiO<sub>2</sub> for photochromism control

Hye Ju lee<sup>1</sup>, Jong Won Shim<sup>2</sup>, Jung Jin Lee<sup>1</sup>, Won Jun Lee<sup>1,\*</sup>

<sup>1</sup>Department of Fiber System Engineering, Dankook University, Yongin 16890, Republic of Korea

<sup>2</sup>Department of Applied Chemistry, Dongduk Women's University, Seoul, 02748 Republic of Korea

### Contents

Figure S1: A representative SEM image of control TiO<sub>2</sub> used in this study\

Figure S2: (a) CIE L\*a\*b\* 1931 chromaticity diagram, and (b) tabulated value of L\*, a\*, and b\* from red colored pastes

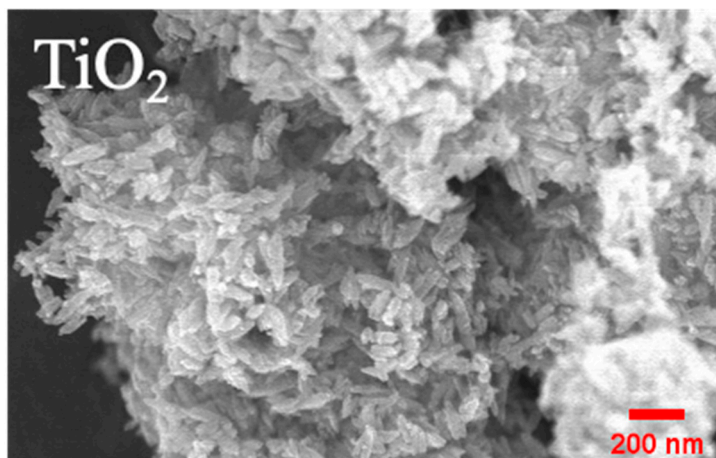

**Figure S1.** A representative HR-SEM image of control  $\text{TiO}_2$  used in this study

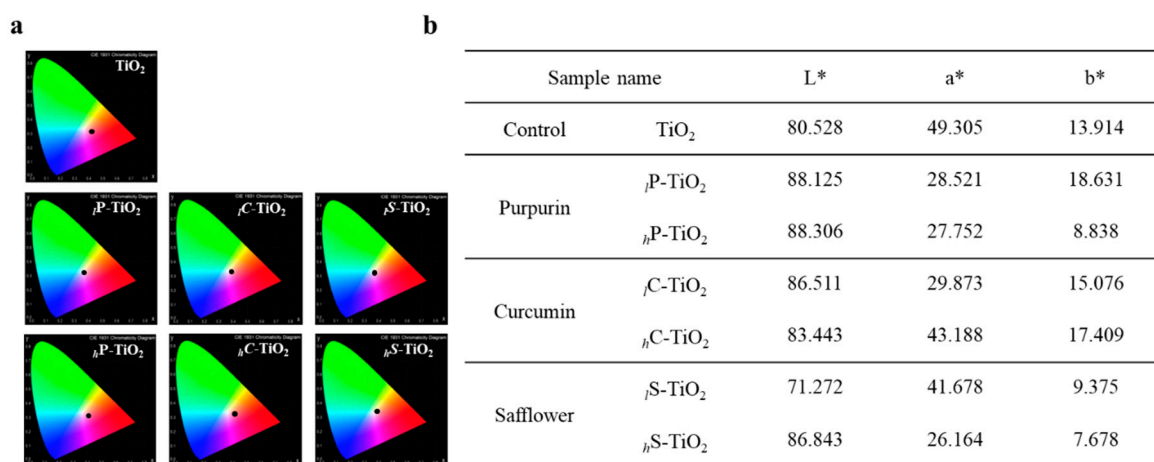

**Figure S2.** (a) CIE  $L^*a^*b^*$  1931 chromaticity diagram, and (b) tabulated value of  $L^*$ ,  $a^*$ , and  $b^*$  from red colored pastes
